# Supplementary material for: Dual-wavelength electrochemiluminescence ratiometry for hydrogen sulfide detection based on Cd2+-doped g-C3N4 nanosheets
Source: Royal Society of Chemistry journal article supplement (doi:10.1039/d1an01873f), 2021-12-03
Supplement: d1an01873f1.pdf [file d1an01873f1.pdf]

## Supplementary Materials

### **Dual-wavelength electrochemiluminescence ratiometry for hydrogen sulphide detection based on Cd<sup>2+</sup>-doped g-C<sub>3</sub>N<sub>4</sub> naonsheets**

Jun-Tao Cao,<sup>\*a</sup> Yi-Zhuo Fu,<sup>a</sup> Xiao-Long Fu,<sup>a</sup> Shu-Wei Ren,<sup>b</sup> and Yan-Ming Liu<sup>\*a</sup>

*<sup>a</sup>College of Chemistry and Chemical Engineering, Xinyang key laboratory of functional nanomaterials for bioanalysis, Xinyang Normal University, Xinyang 464000, China*

*<sup>b</sup>Xinyang Central Hospital, Xinyang 464000, China*

\*Corresponding author: E-mail: liuym9518@sina.com (Y.-M. Liu) and jtcao11@163.com (J.-T. Cao), Tel & fax: +86-376-6392889.

**Table S1.** Analytical results of the proposed method for H<sub>2</sub>S in human plasma samples.

| Serum Samples No. | Found ( $\mu\text{M}$ ) | RSDs ( $\%, n = 3$ ) |
|-------------------|-------------------------|----------------------|
| 1                 | 0.53                    | 7.6                  |
| 2                 | 0.46                    | 5.5                  |
| 3                 | 0.59                    | 5.6                  |
| 4                 | 0.65                    | 4.8                  |
| 5                 | 0.61                    | 3.9                  |

**Table S2.** Recovery tests of H<sub>2</sub>S in human serum samples.

| Serum samples | Found (μM) | Added (μM) | Total Found (μM) | Recoveries (%) | RSDs (% , <i>n</i> = 3) |
|---------------|------------|------------|------------------|----------------|-------------------------|
| 1             | 0.46       | 0.05       | 0.50             | 80.0           | 3.8                     |
|               |            | 0.50       | 0.93             | 94.0           | 6.9                     |
|               |            | 5.00       | 5.48             | 100.4          | 4.3                     |
| 2             | 0.65       | 0.05       | 0.70             | 100.0          | 7.4                     |
|               |            | 0.50       | 1.18             | 106.0          | 3.2                     |
|               |            | 5.00       | 5.63             | 99.6           | 5.9                     |
